# Supplementary material for: Targeting Homologous Recombination Deficiency in Ovarian Cancer with PARP Inhibitors: Synthetic Lethal Strategies That Impact Overall Survival
Source: MDPI journal article supplement (doi:10.3390/cancers14194621), 2022-09-23
Supplement: s1 [file s1]

**Supplementary Table S1.** Clinical trials of PARP inhibitors (PARPis) as a monotherapy in ovarian cancer

| <b>Trial Name;<br/>identifier</b>               | <b>Drug<br/>Name</b> | <b>Phase;<br/>Number of<br/>Patients</b> | <b>Time</b>      | <b>Country/<br/>Countries</b> | <b>Biomarker(s) for<br/>Eligibility</b> | <b>Design</b>                                                                                             | <b>Outcomes</b>                                                                                                                                                                                                                                                                                                                                                                     |
|-------------------------------------------------|----------------------|------------------------------------------|------------------|-------------------------------|-----------------------------------------|-----------------------------------------------------------------------------------------------------------|-------------------------------------------------------------------------------------------------------------------------------------------------------------------------------------------------------------------------------------------------------------------------------------------------------------------------------------------------------------------------------------|
| Study 19;<br>NCT00753545<br>[118,199]           | Olaparib             | II;<br>N=265                             | 2008-<br>2015    | 17 countries                  | N/A                                     | Platinum-sensitive,<br>recurrent HGSOc,<br>received at least 2<br>platinum-based<br>regimens              | OS: 29.8 months [95% CI 26.9-<br>35.7] for olaparib vs 27.8 months<br>[24.9-33.7] for placebo<br>OS: BRCAm 34.9 months [95%<br>CI 29.2-54.6] olaparib vs 30.2<br>months placebo [23.1-40.7]).<br>OS: BRCAwt 24.5 months [19.8-<br>35.0] olaparib vs 26.6 months<br>[23.1-32.5] placebo).<br>PFS: 8.4 months olaparib vs 4.8<br>months placebo. [HR] 0.35 (95%<br>CI, 0.25 to 0.49). |
| Study 42;<br>NCT01078662<br>^ [101,199]         | Olaparib             | II;<br>N=298                             | 2010-<br>current | 6 countries                   | gBRCAm                                  | gBRCAm advanced<br>platinum resistant OC<br>having been treated<br>with ≥3 prior lines of<br>chemotherapy | ORR 31.1% (60 of 193; 95% CI,<br>24.6 to 38.1)                                                                                                                                                                                                                                                                                                                                      |
| SOLO-1;<br>NCT01844986<br>[89,93]               | Olaparib             | III;<br>N = 391                          | 2013-<br>current | 15 countries                  | BRCAm                                   | BRCAm OC following<br>first line platinum-based<br>chemotherapy                                           | PFS, 56.0 months with olaparib<br>versus 13.8 months with placebo<br>[HR] 0.33 (95% CI 0.25–0.43)                                                                                                                                                                                                                                                                                   |
| SOLO2/ENGOT-<br>Ov21;<br>NCT01874353<br>[89,94] | Olaparib             | III;<br>N=295                            | 2013-<br>current | 16 countries                  | BRCAm                                   | BRCAm recurrent<br>platinum-sensitive<br>HGSOc or high-grade<br>endometrioid;                             | OS: 51.7 months (95% CI 41.5-<br>59.1) with olaparib and 38.8<br>months (31.4-48.6) with placebo<br>[HR] 0.74 (95% CI 0.54-1.00;<br>p=0.054)                                                                                                                                                                                                                                        |

|                                             |          |                |                  |                      |                                                                                                                                                                               |                                                                                                                                       |                                                                                                                                                                                                           |
|---------------------------------------------|----------|----------------|------------------|----------------------|-------------------------------------------------------------------------------------------------------------------------------------------------------------------------------|---------------------------------------------------------------------------------------------------------------------------------------|-----------------------------------------------------------------------------------------------------------------------------------------------------------------------------------------------------------|
| SOLO-3;<br>NCT02282020<br>[200, 201]        | Olaparib | III;<br>N=266  | 2015-<br>current | USA                  | gBRCAm                                                                                                                                                                        | gBRCAm platinum-<br>sensitive relapsed OC                                                                                             | ORR: olaparib 72.2% vs.<br>chemotherapy 51.4%, odds ratio<br>[OR], 2.53 (95% CI, 1.40 to 4.58;<br>P = .002).                                                                                              |
| ORZORA;<br>NCT02476968<br>[202]             | Olaparib | IV;<br>N=181   | 2015–<br>2021    | 8 countries          | gBRCAm or<br>sBRCAm or<br>mutation in HRR<br>pathway (ATM,<br>BARD1, BRIP1,<br>CDK12, CHEK1,<br>CHEK2, FANCL,<br>PALB2, PPP2R2A,<br>RAD51B, RAD51C,<br>RAD51D, and<br>RAD54L) | Platinum sensitive<br>relapsed BRCAm or<br>HRD OC with complete<br>or partial response<br>following platinum-<br>based chemotherapy   | PFS 18.0 months, BRCAm; 16.4<br>months, non-BRCA HRD);<br>OS 42.6 months in BRCAm and<br>39.3 months in non-BRCA HRD                                                                                      |
| CLIO/BGOG-<br>ov10;<br>NCT02822157<br>[203] | Olaparib | II;<br>N=160   | 2016-<br>current | Belgium              | N/A                                                                                                                                                                           | Recurrent OC treated<br>with at least one<br>previous line of<br>chemotherapy                                                         | ORR: in heavily pretreated<br>PROC (>4 prior lines) was 22.9%<br>(8/35)<br>ORR: 35.7% (5/14) and 13.2%<br>(7/53) in BRCAm and BRCAwt,<br>respectively                                                     |
| OPINION;<br>NCT03402841<br>[204]            | Olaparib | IIIb;<br>N=279 | 2018-<br>current | 17 countries         | sBRCAm                                                                                                                                                                        | sBRCAm OC with<br>platinum-sensitive<br>relapsed ovarian cancer<br>(PSROC) and had<br>received ≥2 previous<br>lines of platinum-based | Median PFS was 9.2 months,<br>(95% CI, 7.6-10.9).<br>PFS was 16.4, 11.1, 9.7, and 7.3<br>months in sBRCAm, HRD<br>including sBRCAm, HRD<br>excluding sBRCAm, and HRR<br>proficient patients, respectively |
| OVAL-1;<br>NCT04532645<br>[201]             | Olaparib | N=350          | 2020-<br>current | France, Italy,<br>UK | BRCAm                                                                                                                                                                         | BRCAm advanced<br>(FIGO stage III-IV)<br>ovarian cancer patients                                                                      |                                                                                                                                                                                                           |

|                                 |           |                                               |               |              | who received first dose<br>maintenance olaparib |                                                                                                                                                                                                                                                                                                                                                                                                                                                                                                                                                                                                                                                               |
|---------------------------------|-----------|-----------------------------------------------|---------------|--------------|-------------------------------------------------|---------------------------------------------------------------------------------------------------------------------------------------------------------------------------------------------------------------------------------------------------------------------------------------------------------------------------------------------------------------------------------------------------------------------------------------------------------------------------------------------------------------------------------------------------------------------------------------------------------------------------------------------------------------|
| ARIEL2;<br>NCT01891344<br>[22]  | Rucaparib | II; (Part I<br>N=204 and<br>Part II<br>N=287) | 2013–<br>2019 | 7 countries  | BRCAm;<br>tumor genomic<br>LOH (high or low)    | Relapsed OC: BRCAm,<br>BRCAwt and LOH high<br>(LOH high group), or<br>BRCAwt and LOH low<br>(LOH low group).<br><br>Part I: median PFS: 12.8 months,<br>(9.0–14.7) in BRCAm vs. 5.7 (5.3–<br>7.6) in LOH high group vs 5.2<br>(3.6–5.5) in LOH low group. PFS<br>is significantly longer in<br>BRCAm [HR] 0.27, (95% CI,<br>0.16–0.44, P < 0.0001) and LOH<br>high [HR] 0.62, (95% CI 0.42–<br>0.9, P = 0.011). compared to LOH<br>low group.<br><br>Part II: confirmed ORR: 31%<br>(21.3–42), 6.8% (2.3– 15.3) and<br>5.6% (2.1– 11.8), respectively.<br>Median PFS: 7.8 months (7.3–<br>9.2) vs 4.3 months (3.5–5.7) vs<br>4.0 months (3.5–5.3), P < 0.001) |
| ARIEL3;<br>NCT01968213<br>[104] | Rucaparib | III;<br>N=564                                 | 2014–<br>2016 | 11 countries | N/A                                             | Relapsed platinum-<br>sensitive, OC<br><br>PFS in BRCAm carcinoma was<br>16.6 months (95% CI 13.4–22.9;<br>130 [35%] patients) in the<br>rucaparib group versus 5.4<br>months (3.4–6.7; 66 [35%]<br>patients) in the placebo group<br>[HR] 0.23 [95% CI 0.16–0.34];<br>p<0.0001). PFS: in patients with<br>a HRD carcinoma (236 [63%] vs<br>118 [62%]) was 13.6 months<br>(10.9–16.2) versus 5.4 months<br>(5.1–5.6; [HR] 0.32 [95% CI 0.24–<br>0.42]; p<0.0001).                                                                                                                                                                                             |

|                                    |           |               |                  |                |                          |                                                                                                                                                                                                                     |                                                                                                                                                                                                                   |
|------------------------------------|-----------|---------------|------------------|----------------|--------------------------|---------------------------------------------------------------------------------------------------------------------------------------------------------------------------------------------------------------------|-------------------------------------------------------------------------------------------------------------------------------------------------------------------------------------------------------------------|
| ARIEL4;<br>NCT02855944<br>[205]    | Rucaparib | III;<br>N=349 | 2017-<br>current | USA            | N/A                      | Relapsed OC. Received<br>≥ 2 prior chemotherapy<br>regimens and have<br>relapsed or progressive<br>disease                                                                                                          | PFS: 7.4 months (95% CI 7.3–9.1)<br>in the rucaparib group versus<br>5.7 months (5.5–7.3) in the<br>chemotherapy group [HR] 0.64<br>(95% CI 0.49–0.84); p=0.0010).                                                |
| ATHEN;<br>NCT03522246<br>[206,207] | Rucaparib | III;<br>N=538 | 2018-<br>current | 24 countries   | N/A                      | First-line; Newly<br>diagnosed advanced OC                                                                                                                                                                          | PFS: 28.7 months (95% CI) with<br>rucaparib versus 11.3 months<br>with placebo in the HRD<br>population (log-rank P = .0004;<br>[HR], 0.47; 95% CI, 0.31 to 0.72)                                                 |
| MAMOC;<br>NCT04227522<br>[208]     | Rucaparib | III;<br>N=190 | 2020-<br>current | Germany        | BRCAm                    | Maintenance after<br>Bevacizumab<br>maintenance following<br>carboplatin based first<br>line chemotherapy,<br>BRCAm patients with<br>histologically<br>confirmed, advanced<br>OC in first line therapy.             |                                                                                                                                                                                                                   |
| NOVA;<br>NCT01847274<br>[103]      | Niraparib | III;<br>N=553 | 2013-<br>current | GSK, US        | N/A                      | Maintenance in<br>platinum sensitive OC<br>patients who have either<br>gBRCAm or a tumor<br>with HGS histology and<br>who have responded to<br>their most recent<br>chemotherapy<br>containing a platinum<br>agent. | PFS: gBRCAm 21.0 months with<br>niraparib vs 5.5 months with<br>placebo<br>PFS: BRCAwt 9.3 months with<br>niraparib vs 3.9 months with<br>placebo [HR] (95% CI) gBRCAm<br>0.3 (0.2–0.4); BRCAwt 0.5 (0.3–<br>0.6) |
| QUARA;<br>NCT02354586<br>[105]     | Niraparib | II;<br>N=463  | 2015-<br>2021    | USA/<br>Canada | BRCAm or HRD<br>positive | HRD platinum-sensitive<br>OC tumors which<br>received three to five                                                                                                                                                 | OS: 12.2 months<br>ORR: 24%, 95% CI 16–34%                                                                                                                                                                        |

|                                                  |             |               |              |              |       | previous chemotherapy regimens, and PARPi naïve.                                                                                                                               |                                                                                                                                                                                                                                                                                                         |
|--------------------------------------------------|-------------|---------------|--------------|--------------|-------|--------------------------------------------------------------------------------------------------------------------------------------------------------------------------------|---------------------------------------------------------------------------------------------------------------------------------------------------------------------------------------------------------------------------------------------------------------------------------------------------------|
| PRIMA/ENGOT-OV26/GOG-3012<br>NCT02655016<br>[97] | Niraparib   | III;<br>N=733 | 2016-current | 20 countries | N/A   | Maintenance treatment in advanced OC following response on front-line platinum-based chemotherapy                                                                              | PFS: All 13.8 months niraparib vs 8.2 months placebo<br>PFS: HRD 21.9 months niraparib vs 10.4 months placebo. [HR] (95% CI) All 0.6 (0.5–0.8) HRD 0.4 (0.3–0.6)                                                                                                                                        |
| NIRVANA-R;<br>NCT04734665<br>[209]               | Niraparib   | II;<br>N=44   | 2021-current | Korea        | N/A   | PFS (6 months PFS rate) with PS recurrent OC previously treated with a PARPi.                                                                                                  |                                                                                                                                                                                                                                                                                                         |
| NCT03509636<br>[70,114]                          | Fuzuloparib | I;<br>N=113   | 2018-2020    | China        | BRCAm | Platinum-sensitive recurrent OC (disease progression or relapse ≥6 months after the last dose of platinum-based therapy) and BRCAm                                             | ORR: The IRC- and investigator-assessed 69.9% (95% CI, 60.6–78.2) and 70.8% (95% CI, 61.5–79.0), respectively.<br>PFS: The IRC- and investigator-assessed 12.0 months (95% CI, 9.3–13.9) with Fuzuloparib and 10.3 months (95% CI, 9.2–12.0). The 12-month survival rate was 93.7% (95% CI, 87.2–96.9). |
| NCT03863860<br>[70]                              | Fuzuloparib | III;<br>N=252 | 2019-current | China        | N/A   | platinum-sensitive recurrent OC after at least two previous lines of platinum-based chemotherapy and achieved either complete or partial response to their most recent regimen | PFS: As of July 1, 2020, the median PFS was significantly improved with Fuzuloparib treatment [HR], 0.25; (95% CI, 0.17 to 0.36; one-sided P < .0001) compared with placebo. Trend of benefit in patients with gBRCAm [HR], 0.14; (95% CI, 0.07 to 0.28) compared to                                    |

|                     |                |             |              |             |       |                                                                                                                  |                                                                                                                                                   |
|---------------------|----------------|-------------|--------------|-------------|-------|------------------------------------------------------------------------------------------------------------------|---------------------------------------------------------------------------------------------------------------------------------------------------|
|                     |                |             |              |             |       |                                                                                                                  | BRCAwt [HR], 0.46; (95% CI, 0.29 to 0.74).                                                                                                        |
| NCT03519230 [69]    | Pamiparib      | III; N=216  | 2018-current | China       | N/A   | Platinum-sensitive recurrent OC                                                                                  |                                                                                                                                                   |
| NCT03333915 [69]    | Pamiparib      | I/II; N=113 | 2019-current | China       | BRCAm | Platinum sensitive or resistance recurrent OC with gBRCAm and > 2 lines therapy                                  | ORR: 31.6% \ OR: 11.1 months PFS: 6.2 months PS OC; ORR: 64.6% PFS: 15.2 months PR OC; ORR: 31.6%, PFS: 6.2 months                                |
| NCT00892736 ^ [210] | Veliparib      | I; N=98     | 2009-2017    | USA         | N/A   | Recurrent platinum-refractory OC that progressed following standard therapy or had no standard treatment options | ORR: 23% (95% CI 13–35%) in BRCAm and 8% (95% CI 1–26%) in BRCAwt. CBR: 16% (95% CI 4–36%), reflecting prolonged stable disease in some patients. |
| NCT01339650 ^ [211] | ABT-767        | I; N=93     | 2011-2017    | Netherlands | BRCAm | Recurrent BRCAm advanced solid tumors and in OC                                                                  | PRS: 6.7 months in HRD versus 1.8 months in HRR proficient patients with OC.                                                                      |
| NCT03878849 ^ [212] | E7449 (2X-121) | II; N=60    | 2019-current | USA/UK      | N/A   | Advanced OC                                                                                                      |                                                                                                                                                   |

**Supplementary Table S2.** Clinical trials of PARP inhibitors (PARPis) in combination therapy for ovarian cancer

| Trial Name; identifier              | Drug Name                                              | Phase;<br>Number of<br>Patients | Time             | Country/<br>Countries | Biomarker(s) for<br>Eligibility                                                                                                                                                                                                                                                  | Design                                                                                                                  | Outcomes                                                                                                                                                                            |
|-------------------------------------|--------------------------------------------------------|---------------------------------|------------------|-----------------------|----------------------------------------------------------------------------------------------------------------------------------------------------------------------------------------------------------------------------------------------------------------------------------|-------------------------------------------------------------------------------------------------------------------------|-------------------------------------------------------------------------------------------------------------------------------------------------------------------------------------|
| PARPi + chemotherapy                |                                                        |                                 |                  |                       |                                                                                                                                                                                                                                                                                  |                                                                                                                         |                                                                                                                                                                                     |
| MITO25;<br>NCT03462212A [213]       | Rucaparib +<br>carboplatin/paclitaxel                  | II;<br>N=244                    | 2018-<br>current | Italy                 | N/A                                                                                                                                                                                                                                                                              | Advanced OC                                                                                                             |                                                                                                                                                                                     |
| VELIA;<br>NCT02470585 [214]         | Veliparib +<br>Carboplatin/Paclitaxel                  | III; N=1140                     | 2015-<br>current | USA                   | N/A                                                                                                                                                                                                                                                                              | Newly diagnosed stage III or<br>IV OC                                                                                   | PFS: 34.7 (veliparib) vs. 22<br>(control) in BRCAm-<br>cohort, [HR]0.44, (95% CI:<br>0.28–0.68).<br><br>PFS: 31.9 vs. 20.5 in the<br>HRD cohort, [HR] 0.57,<br>(95% CI: 0.43–0.76). |
| PARPi + DNA Damage Repair inhibitor |                                                        |                                 |                  |                       |                                                                                                                                                                                                                                                                                  |                                                                                                                         |                                                                                                                                                                                     |
| OLAPCO;<br>NCT02576444 ^ [215]      | Olaparib + AZD6738<br>(Ceralasertib; ATR<br>inhibitor) | II; N=24                        | 2015-current     | USA                   | BRCAm or<br>mutations such as<br>ATM, CHK2, MRN<br>(MRE11/NBS1/RAD<br>50), CDKN2A/B and<br>APOBEC;<br>IDH1/IDH2<br>mutations; TP53<br>and/or KRAS<br>mutations; PTEN,<br>PIK3CA, AKT, or<br>ARID1A mutations<br>or other molecular<br>aberrations leading<br>to dysregulation of | Relapsed HGSOC resistant to<br>platinum and PARP inhibitors<br>(1-3 prior agents) harboring<br>HRR mutations and BRCAm. | Of 7 HSGOC patients; 1<br>achieved partial response,<br>3 had regression < 30% (1<br>ongoing at 1 year) and 3<br>patients had progressive<br>disease                                |

| the PI3K/AKT pathway                  |                                                                                         |               |                    |     |                                          |                                                                                 |                                                                                                       |
|---------------------------------------|-----------------------------------------------------------------------------------------|---------------|--------------------|-----|------------------------------------------|---------------------------------------------------------------------------------|-------------------------------------------------------------------------------------------------------|
| NCT02898207 ^ [88,216]                | Olaparib + AT13387<br>(Onalespib; Hsp90 inhibitor)                                      | I;<br>N=28    | 2017-current       | USA | N/A                                      | Treatment of advanced solid tumors with expansion in patients with recurrent OC |                                                                                                       |
| EFFORT;<br>NCT03579316 [88,217]       | Olaparib + AZD1775<br>(Adavosertib; WEE1 inhibitor)                                     | II; N=80      | 2018-current       | USA | N/A                                      | Recruiting; Recurrent OC                                                        | Adavosertib: ORR = 23%;<br>PFS = 5.5 months<br>Adavosertib + Olaparib:<br>ORR = 29%, PFS = 6.8 months |
| ATARI; NCT04065269 [218]              | Olaparib + AZD6738<br>(ATR inhibitor)                                                   | II; N=40      | 2019-current       | UK  | ARID1A-deficient ('loss') and "no loss." | Recruiting; Gynecological cancers with ARID1A loss or no loss                   |                                                                                                       |
| CAPRI;<br>NCT03462342 [219]           | Olaparib + AZD6738<br>(Ceralasertib; ATR inhibitor)                                     | II;<br>N=86   | 2022-current       | USA | N/A                                      | Recruiting; recurrent platinum-sensitive or platinum-resistant OC               | PFS 4.2 months overall (90% CI: 3.5-8.2) and 8.2 months for patients with BRCAm                       |
| NCT04267939 ^ [218]                   | Niraparib + BAY1895344<br>(ATR inhibitor)                                               | I/Ib;<br>N=56 | 2020-current       | USA | N/A                                      | Recruiting; Advanced OC                                                         |                                                                                                       |
| NCT04149145 [220]                     | Niraparib + M4344<br>(ATR inhibitor)                                                    | I;<br>N=40    | not yet recruiting | USA | N/A                                      | Recurrent OC that has progressed while on a PARP                                |                                                                                                       |
| PARPi + PI3K / AKT pathway inhibitors |                                                                                         |               |                    |     |                                          |                                                                                 |                                                                                                       |
| NCT01623349 ^ [88,221]                | Olaparib + BKM120<br>(pan-PI3K inhibitor) or BYL719 (selective PI3K $\alpha$ inhibitor) | I;<br>N=118   | 2012-2020          | USA | N/A                                      | Recurrent HGSOC                                                                 | Of the 28 patients with OC, ten (36%) achieved a partial response and 14 (50%) had stable disease     |



|                            |                                                  |              |              |                   |       |                                                                           |                                                                                                                                                                                                                                                                                                                                                                                    |
|----------------------------|--------------------------------------------------|--------------|--------------|-------------------|-------|---------------------------------------------------------------------------|------------------------------------------------------------------------------------------------------------------------------------------------------------------------------------------------------------------------------------------------------------------------------------------------------------------------------------------------------------------------------------|
| NCT02208375 [222]          | Olaparib + AZD5363 (Capivasertib; AKT inhibitor) | I/II; N=159  | 2014-current | USA               | BRCAm | BRCAm recurrent OC                                                        | ORR = 19%;<br>PFS = 14 months;<br>CBR = 34%                                                                                                                                                                                                                                                                                                                                        |
| NCT04586335 ^ [88]         | Olaparib + CYH33 (PI3Kα inhibitor)               | I; N=350     | 2020-current | USA and Australia | N/A   | Recruiting; recurrent platinum resistant or refractory HGSOc              |                                                                                                                                                                                                                                                                                                                                                                                    |
| NCT03586661 [88,222]       | Niraparib + Copanlisib (PI3K inhibitor)          | Ib; N=44     | 2019-current | USA               | BRCAm | Recruiting; recurrent HGSOc, or deleterious BRCAm recurrent OC            |                                                                                                                                                                                                                                                                                                                                                                                    |
| PARPi + Anti-angiogenic    |                                                  |              |              |                   |       |                                                                           |                                                                                                                                                                                                                                                                                                                                                                                    |
|                            |                                                  | II; N=155    | 2010-2018    | USA               | BRCAm | Recurrent advanced OC                                                     | PFS 17.7 months for women with cediranib plus olaparib combination treatment compared with 9.0 months for those with olaparib monotherapy. Significant improvement in PFS gBRCAwt women receiving cediranib/olaparib (16.5 vs. 5.7 mos, p = 0.008) PFS: gBRCAm patients (19.4 vs. 16.5 mos, p = 0.16).<br>ORR: in the 18 OC patients 44%, with CBR (ORR plus SD >24 weeks) of 61%. |
| NCT01116648 ^ [223]        | Olaparib + AZD2171 (Cediranib; VEGF inhibitor)   |              |              |                   |       |                                                                           |                                                                                                                                                                                                                                                                                                                                                                                    |
|                            |                                                  | III; (N=806) | 2015-2019    | 11 countries      | N/A   | First line maintenance; advanced OC treated standard first-line treatment | PFS: 22.1 months vs 16.6 months; [HR], 0.59; (95% CI 0.49 to 0.72); P < 0.001; PFS: 37.2 months vs. 17.7 months; [HR] , 0.33; (95% CI 0.25 to 0.45) in patients with HRD including BRCAm;                                                                                                                                                                                          |
| PAOLA-1; NCT02477644 [224] | Olaparib + Bevacizumab (VEGF-A inhibitor)        |              |              |                   |       |                                                                           |                                                                                                                                                                                                                                                                                                                                                                                    |

|                                       |                                                                          |             |              |             |                              |                                                                                                             |                                                                                                          |
|---------------------------------------|--------------------------------------------------------------------------|-------------|--------------|-------------|------------------------------|-------------------------------------------------------------------------------------------------------------|----------------------------------------------------------------------------------------------------------|
|                                       |                                                                          |             |              |             |                              |                                                                                                             | PFS: 28.1 mo vs. 16.6 mo; [HR], 0.43; (95% CI 0.28 to 0.66) in patients with HRD without BRCAm           |
| CONCERTO; NCT02889900 [225]           | Olaparib + AZD2171 (Cediranib; VEGF inhibitor)                           | II; N=62    | 2017-2021    | USA         | No BRCAm                     | Non-BRCAm recurrent platinum resistant OC                                                                   | ORR = 15.3%; median PFS = 5.1 months; median duration of response = 8.3 months; median OS = 13.2 months. |
| NCT04229615 [69]                      | Fuzuloparib + Apatinib (VEGFR2 inhibitor)                                | III; N=690  | 2020-current | China       | N/A                          | Recruiting, maintenance therapy in advanced OC following response on first-line platinum-based chemotherapy |                                                                                                          |
| NCT04517357 [69]                      | Fuzuloparib + Apatinib (VEGFR2 inhibitor)                                | II; N=142   | 2020-current | China       | N/A                          | Recruiting; Advanced OC following 2 or more platinum-containing regimens                                    |                                                                                                          |
| PARPi + Histone Deacetylase inhibitor |                                                                          |             |              |             |                              |                                                                                                             |                                                                                                          |
| NCT04703920 ^ [226]                   | Talazoparib + Belinostat (HDAC)                                          | I; N=25     | 2021-current | USA         | N/A                          | Recruiting; metastatic ovarian cancer                                                                       |                                                                                                          |
| PARPi + Immunotherapy inhibitor       |                                                                          |             |              |             |                              |                                                                                                             |                                                                                                          |
| NCT02734004 ^ [227]                   | Olaparib + MED14736 (PD-L1 inhibitor)                                    | I/II; N=264 | 2016-2021    | 7 countries | N/A                          | Advanced OC                                                                                                 |                                                                                                          |
| NCT02953457 [88]                      | Olaparib + Tremelimumab (CTLA-4 inhibitor) + Duralumab (PD-L1 inhibitor) | II; N=40    | 2017-2021    | USA         | gBRCAm; sBRCAm; HRD LOH high | Recurrent or refractory OC with BRCAm                                                                       |                                                                                                          |
| NCT04034927 [88]                      | Olaparib + Tremelimumab (CTLA-4 inhibitor)                               | II; N=175   | 2019-current | USA         | N/A                          | Recurrent OC                                                                                                |                                                                                                          |

|                                                 |                                                                                 |               |              |              |        |                                                                                                                                                                                     |                                                                            |
|-------------------------------------------------|---------------------------------------------------------------------------------|---------------|--------------|--------------|--------|-------------------------------------------------------------------------------------------------------------------------------------------------------------------------------------|----------------------------------------------------------------------------|
| NCT02571725 [88,228]                            | Olaparib +<br>Tremelimumab<br>(CTLA-4 inhibitor)                                | I/II; N=50    | 2022-current | USA          | gBRCAm | gBRCAm OC                                                                                                                                                                           |                                                                            |
| ATHEN;<br>NCT03522246 [206]                     | Rucaparib+Nivolumab<br>(PD-1 inhibitor)                                         | III; N=538    | 2018-current | 24 countries | N/A    | First-line; Newly diagnosed advanced OC                                                                                                                                             |                                                                            |
| TOPACIO/KEYNOTE-162;<br>NCT02657889 ^ [194,195] | Niraparib +<br>Pembrolizumab<br>(PD-1 inhibitor)                                | I/II; N=122   | 2016-2021    | USA          | N/A    | Completed; platinum resistant OC having experienced a response lasting at least 6 months to first-line platinum-based therapy                                                       | ORR of 18% [5% complete responses and 13% partial responses]<br>CBR of 65% |
| MOONSTONE;<br>NCT03955471 [88,229]              | Niraparib + TSR-042<br>(Dostarlimab; PD-1 inhibitor)                            | II; N=41      | 2019-current | USA          | N/A    | Recurrent OC received 1-3 lines of prior therapy (one of which included bevacizumab), and have disease progression <6 months from the last administered platinum-based chemotherapy |                                                                            |
| ROCSAN;<br>NCT03651206 [230]                    | Niraparib + TSR-042<br>(Dostarlimab; PD-1 inhibitor)                            | II/III; N=196 | 2020-current | France       | N/A    | Recruiting; recurrent or progressing OC after at least a first line of platinum-based chemotherapy                                                                                  |                                                                            |
| PARPi + Multiple Combinations                   |                                                                                 |               |              |              |        |                                                                                                                                                                                     |                                                                            |
| NCT02484404 ^ [231,232]                         | Olaparib +<br>Durvalumab (PD-L1 inhibitor) ±<br>Cediranib<br>(VEGF inhibitor)   | I/II; N=384   | 2015-current | USA          | N/A    | Recruiting; advanced OC                                                                                                                                                             |                                                                            |
| MEDIOLA;<br>NCT02734004 ^ [227]                 | Olaparib +<br>MEDI4736 (PD-L1 inhibitor) +<br>Bevacizumab<br>(VEGF-A inhibitor) | I/II; N=264   | 2016-2021    | 7 countries  | N/A    | Advanced OC                                                                                                                                                                         |                                                                            |
| OPAL;<br>NCT03574779 [88]                       | Niraparib +<br>Dostarlimab (PD-1 inhibitor) +                                   | II; N=125     | 2018-current | USA          | N/A    | Active, recruiting; Recurrent and newly diagnosed OC                                                                                                                                |                                                                            |

|                  |                                                                                       |          |              |        |     |                                                                     |
|------------------|---------------------------------------------------------------------------------------|----------|--------------|--------|-----|---------------------------------------------------------------------|
|                  | Bevacizumab<br>(VEGF-A inhibitor)                                                     |          |              |        |     |                                                                     |
| NCT05065021 [88] | Niraparib +<br>Dostarlimab (PD-1<br>inhibitor) +<br>Bevacizumab<br>(VEGF-A inhibitor) | II; N=40 | 2022-current | Canada | N/A | Not yet recruiting; OC patients<br>who previously received<br>PARPi |

^ Not only ovarian cancer; Abbreviations: BRCAm, BRCA mutant; BRCAwt, BRCA wild-type; CBR, clinical benefit rate; CTLA-4, cytotoxic T-lymphocyte-associated protein 4; gBRCAm, germline BRCA mutant; HDAC, histone deacetylase; HGSOC, high-grade serous ovarian cancer; HR, Hazard Ratio; HRR, Homologous recombination repair; HRD, Homologous recombination deficient; Hsp90, heat shock protein 90; IRC, independent review committee; LOH, loss of heterozygosity; OC, ovarian cancer; ORR, objective response rate; OS, overall survival; PARPi, PARP inhibitor; PD-1, programmed cell death protein 1; PD-L1, programmed death-ligand 1; PFS, progression free survival; PS, platinum sensitive; PR - platinum resistant; PROC, platinum resistant ovarian cancer; sBRCAm, somatic BRCA mutant; VEGF-A, vascular endothelial growth factor A; VEGFR2, vascular endothelial growth factor receptor 2.
